# Supplementary material
Source: MDPI journal article supplement (https://www.mdpi.com/1999-4907/14/6/1075)
Supplement: s1 [file s1]

# Use of functional traits to distinguish successional guilds of tree species for restoring forest ecosystems

Benjapan Manohan, Dia Panitnard Shannon, Pimonrat Tiansawat, Sutthathorn Chairuangsi and Stephen Elliott

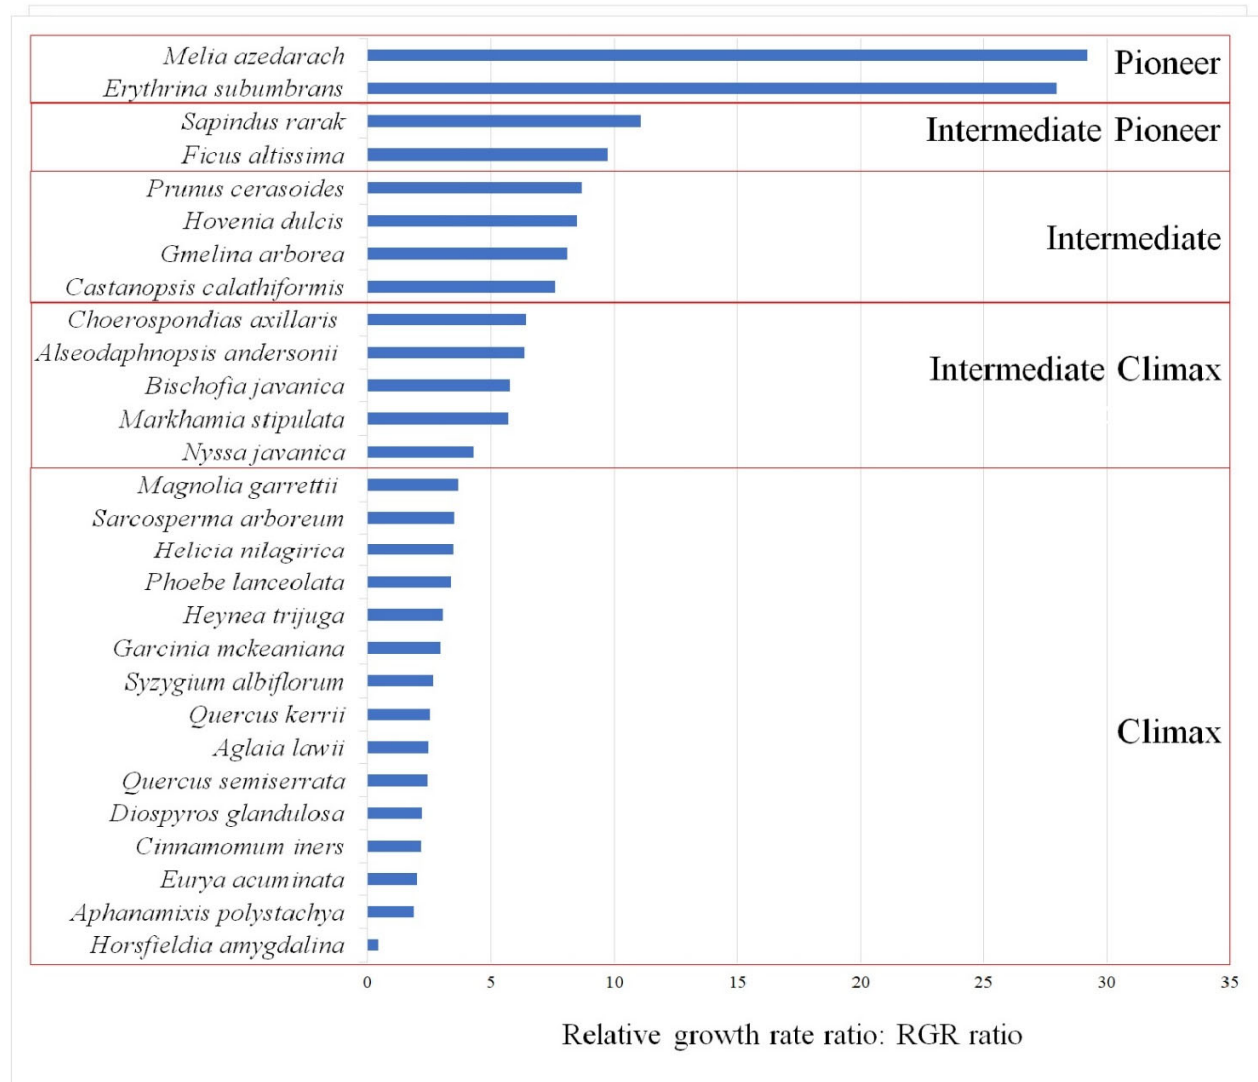

**Figure S1.** Relative growth rate (RGR) ratio as an indicator of successional status (the ratio between relative growth rate pre- and post-canopy closure)

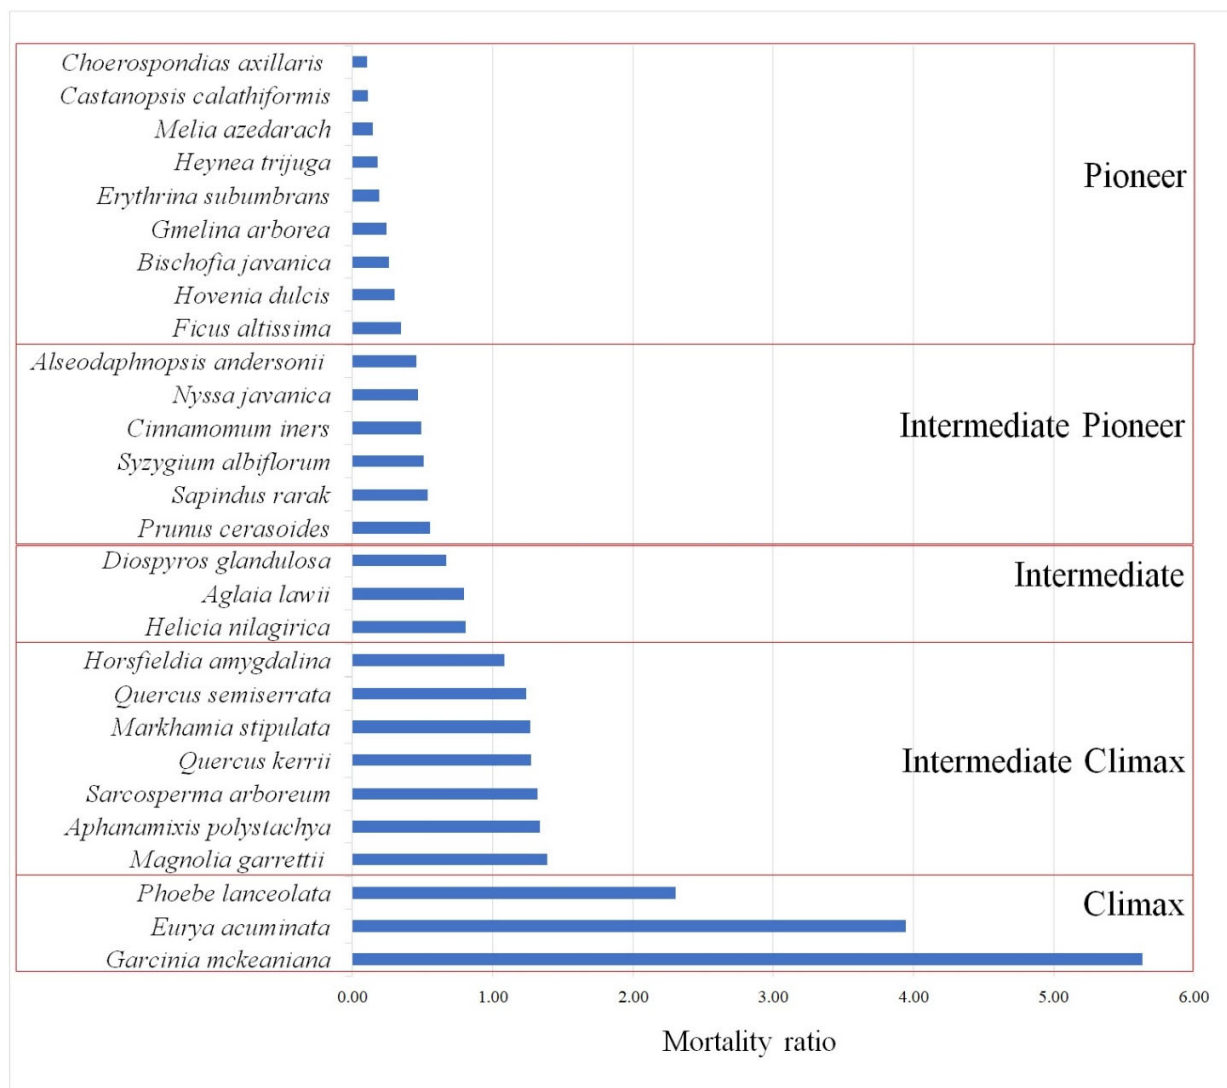

**Figure S2.** Mortality ratio as an indicator of successional status (the ratio between mortality pre- and post-canopy closure)

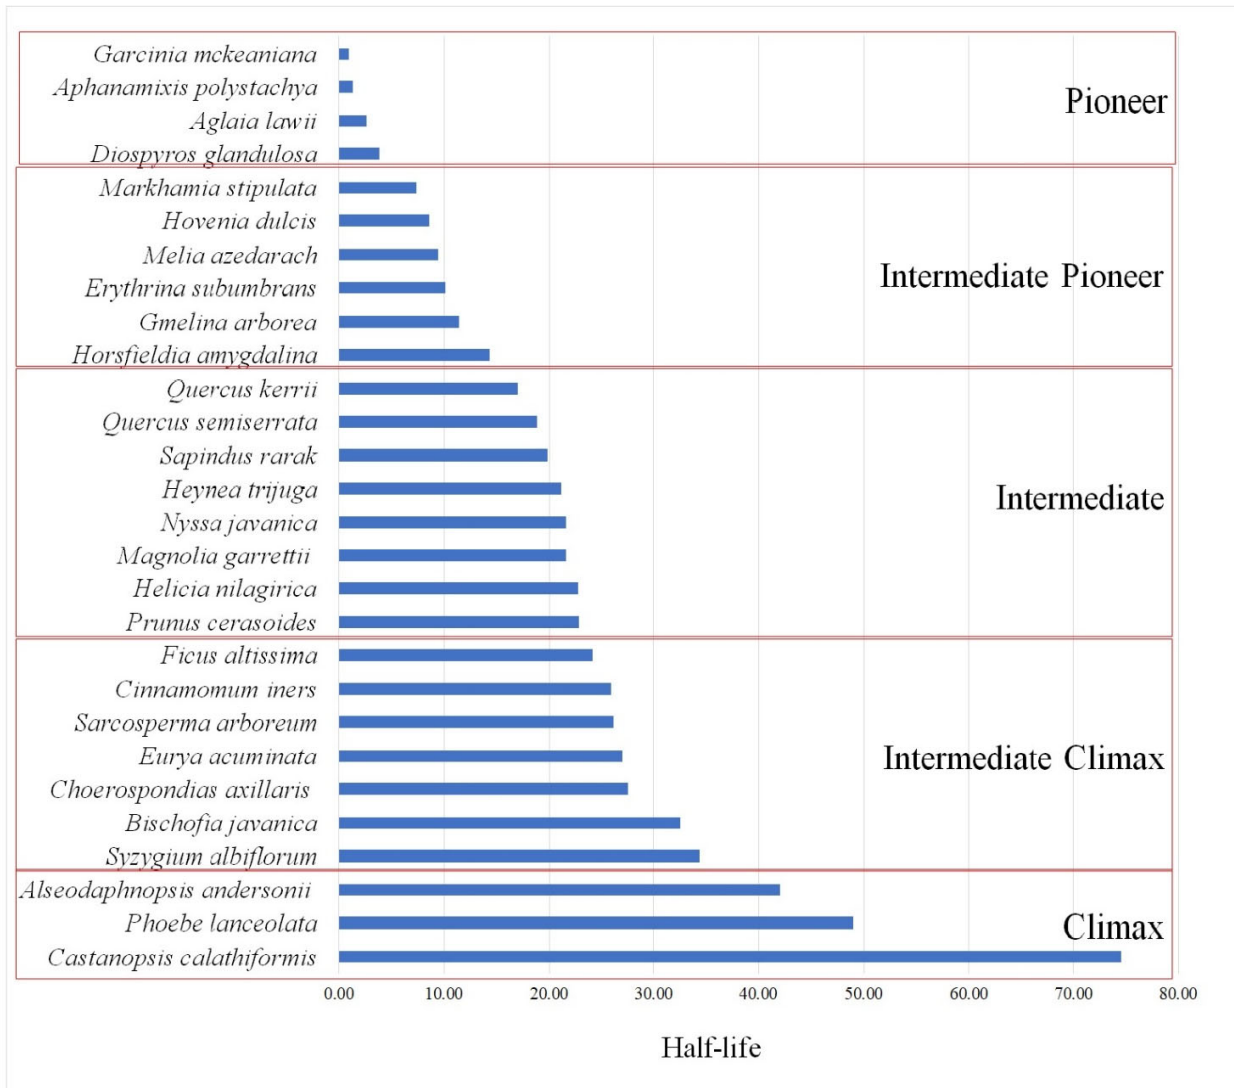

**Figure S3.** Survival half-life as an indicator of successional status.

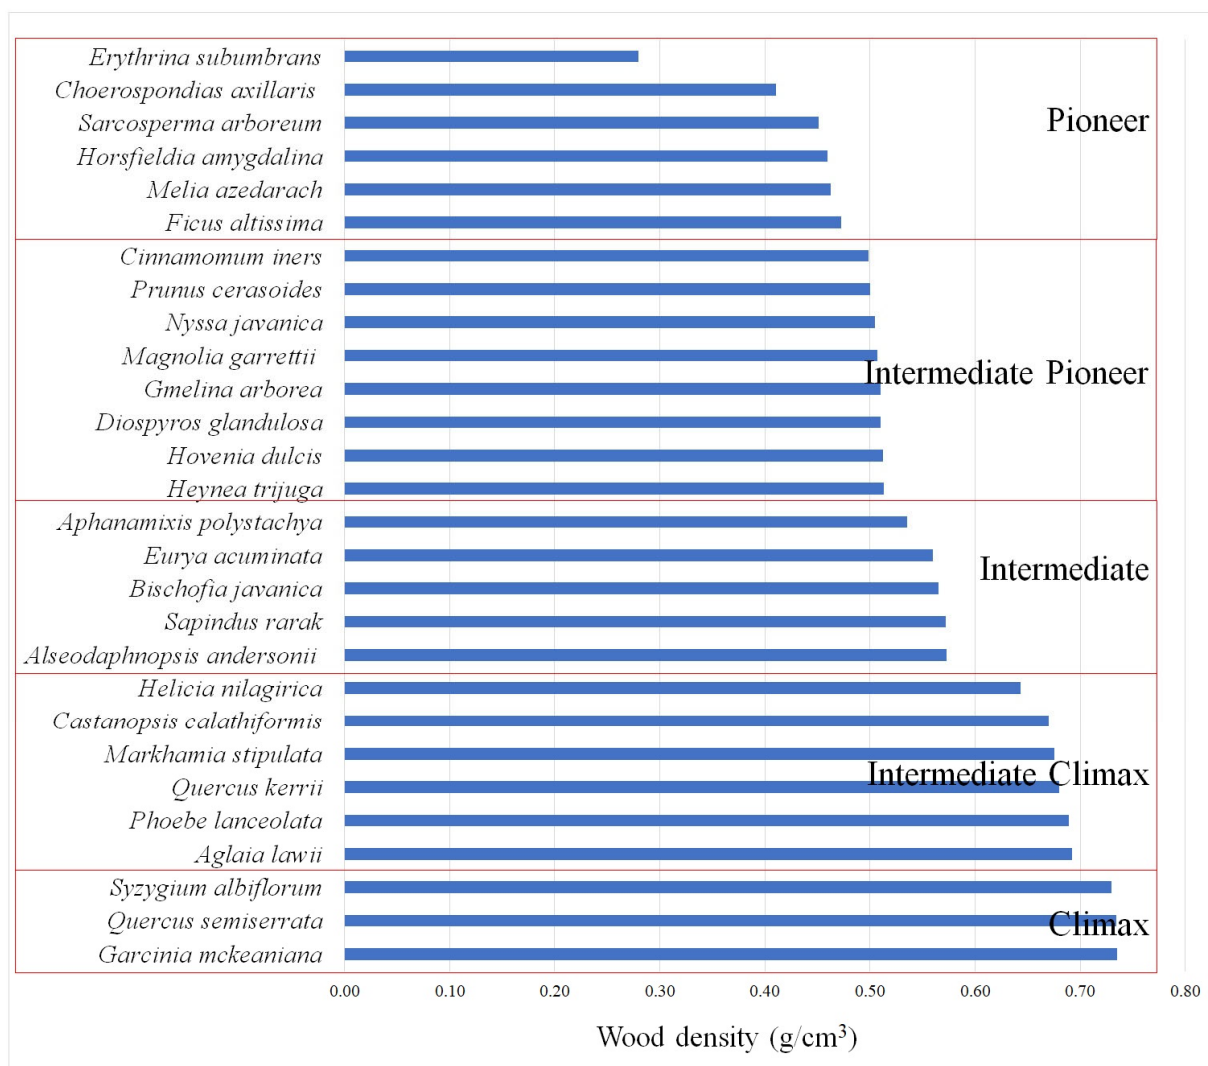

**Figure S4.** Wood density (g/cm³) as an indicator of successional status

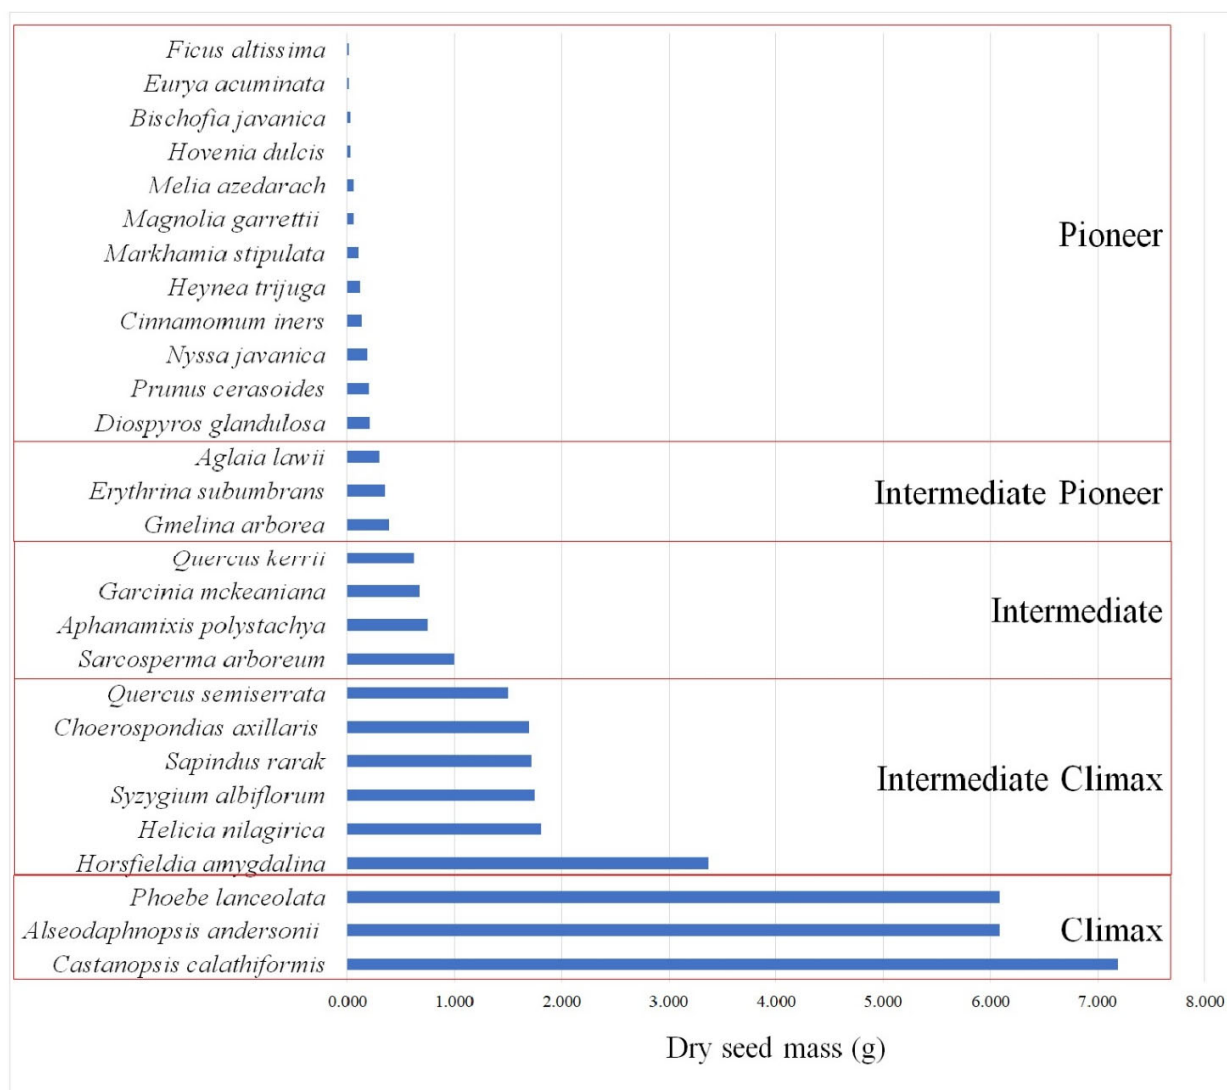

**Figure S5.** Seed size as an indicator of successional status.

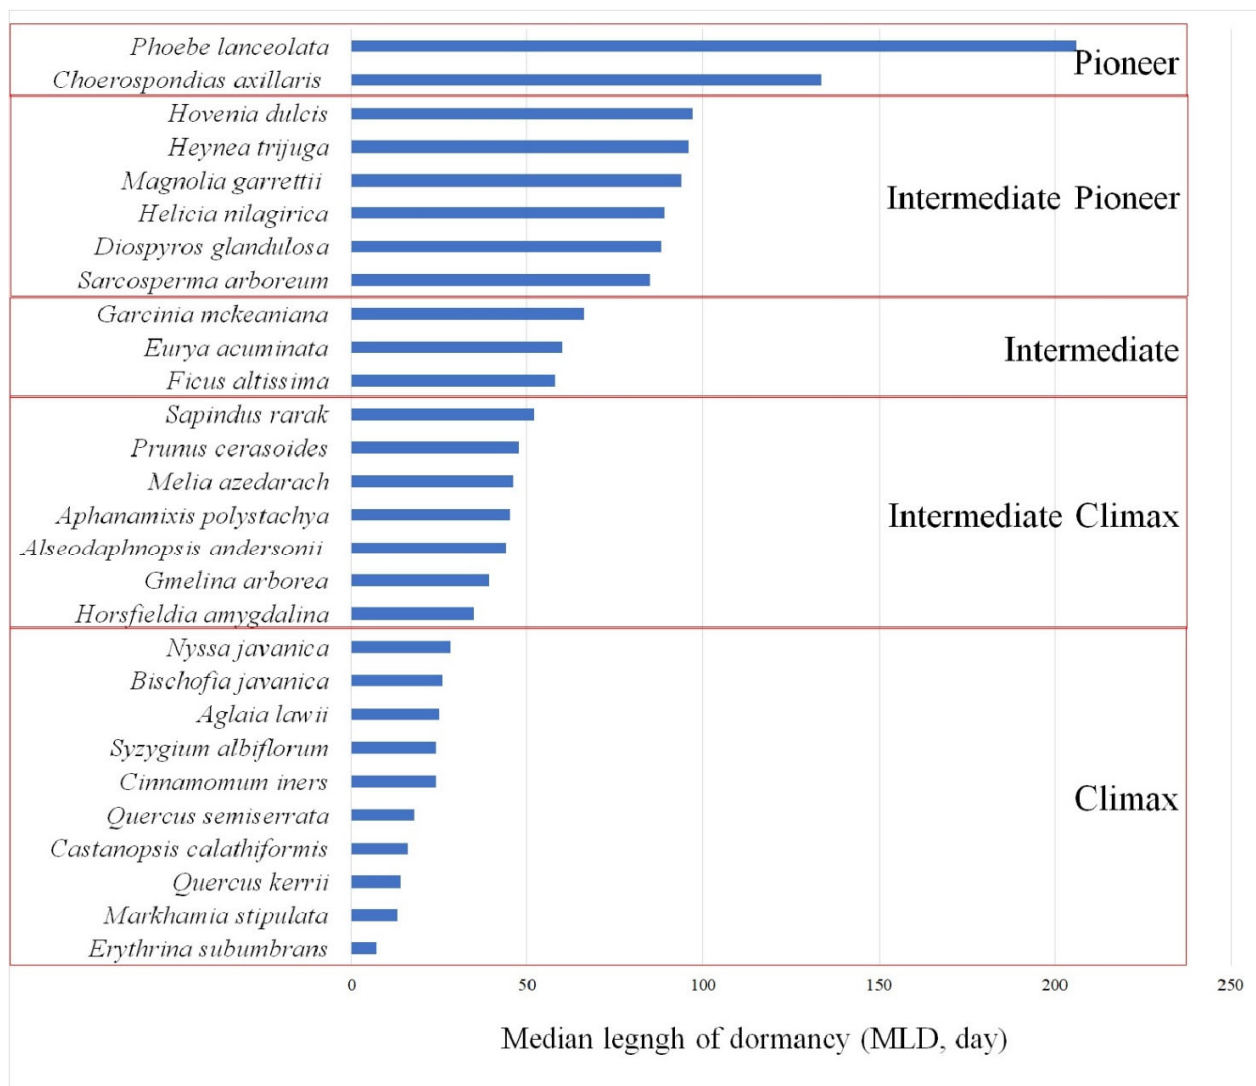

**Figure S6.** Median length of dormancy (MLD) as an indicator of successional status

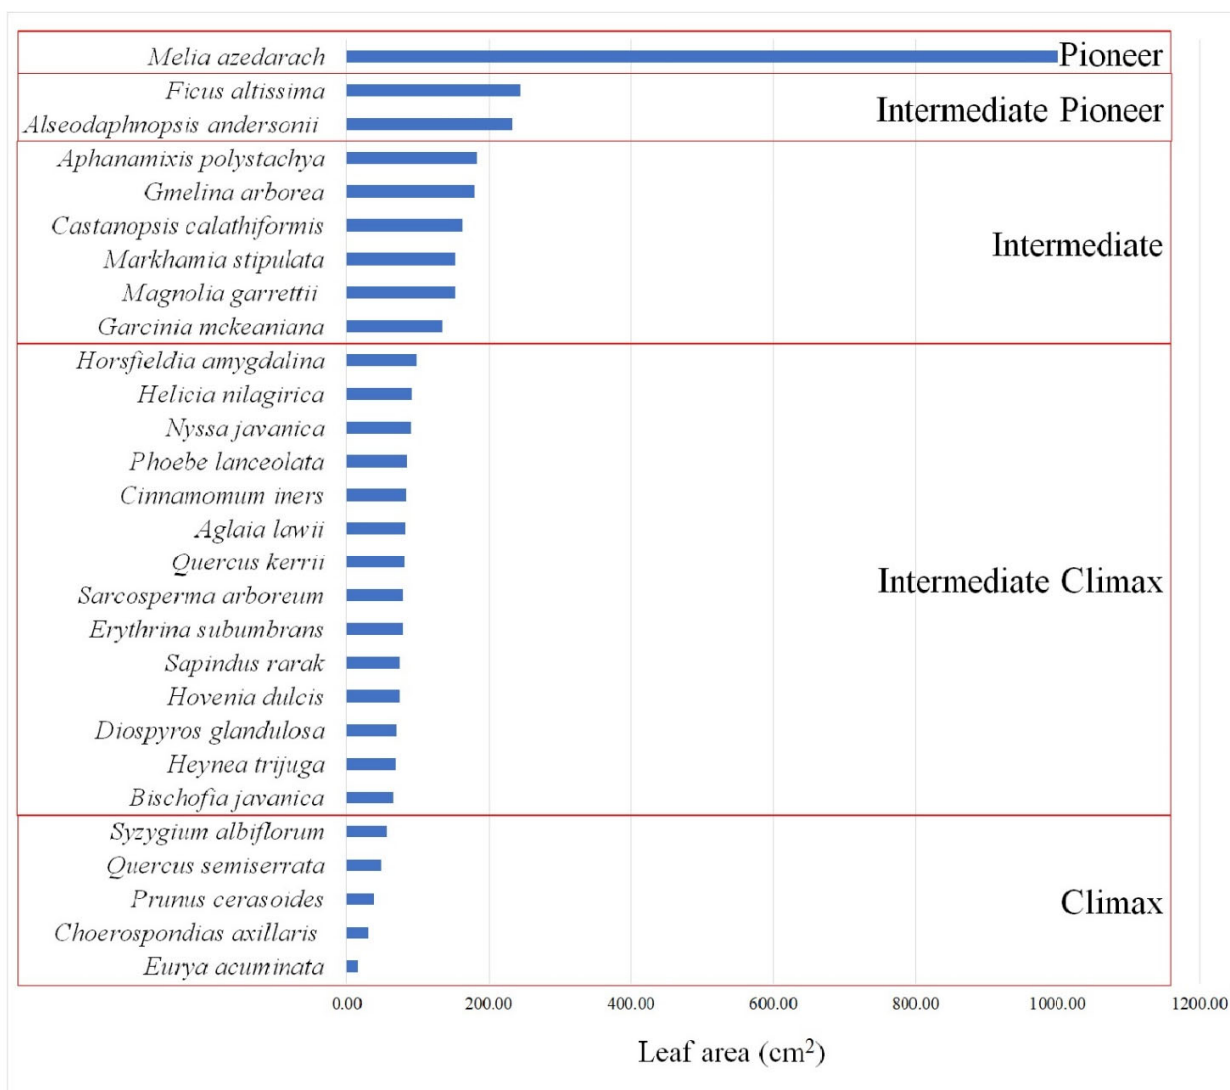

**Figure S7.** Leaf area as an indicator of successional status

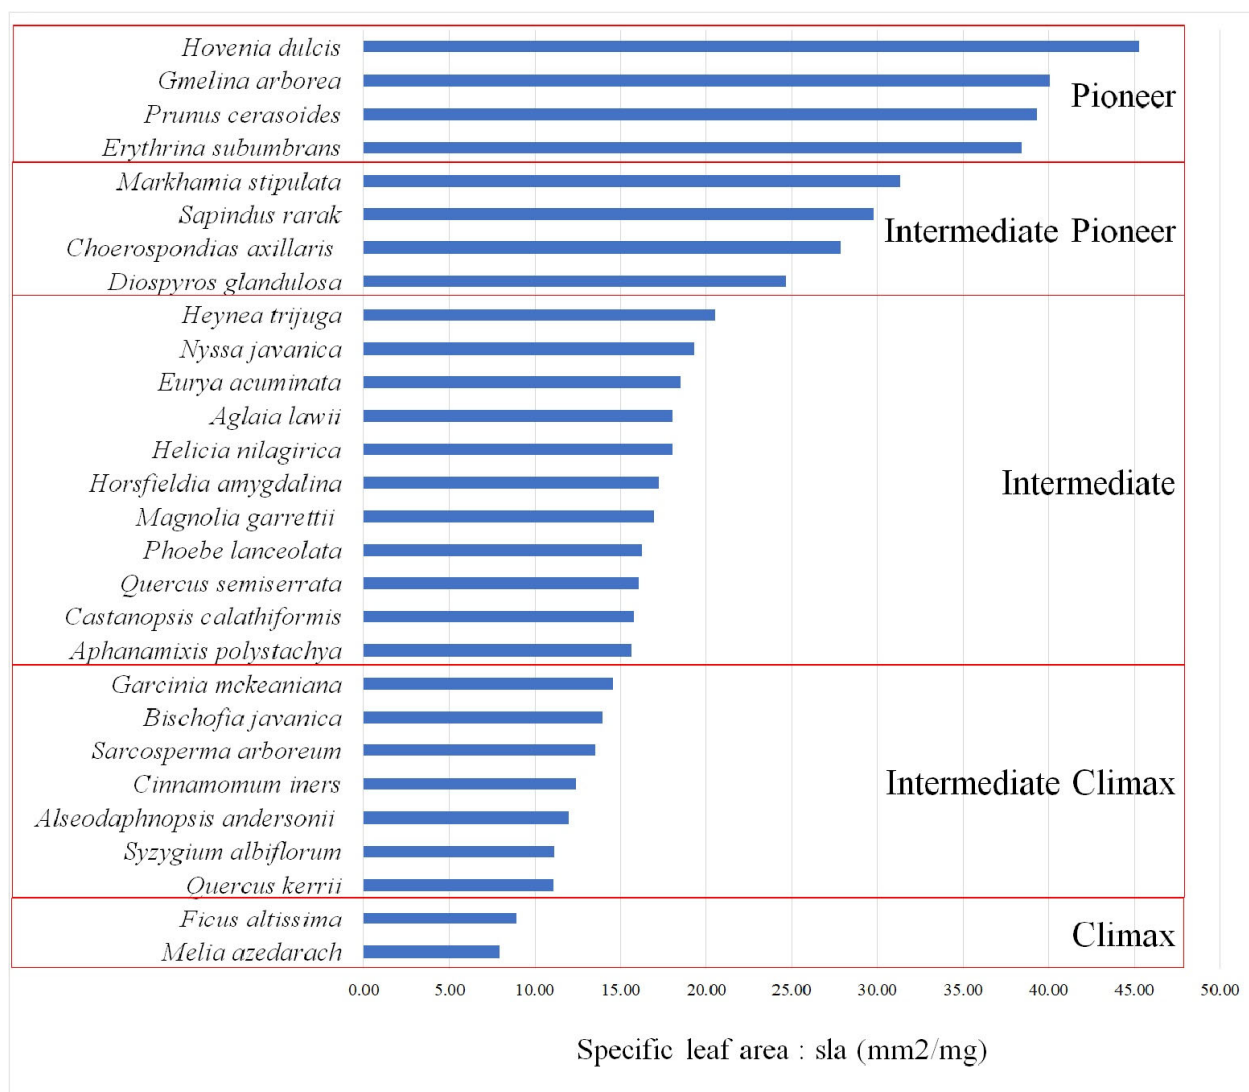

**Figure S8.** Specific leaf area (SLA) as an indicator of successional status.



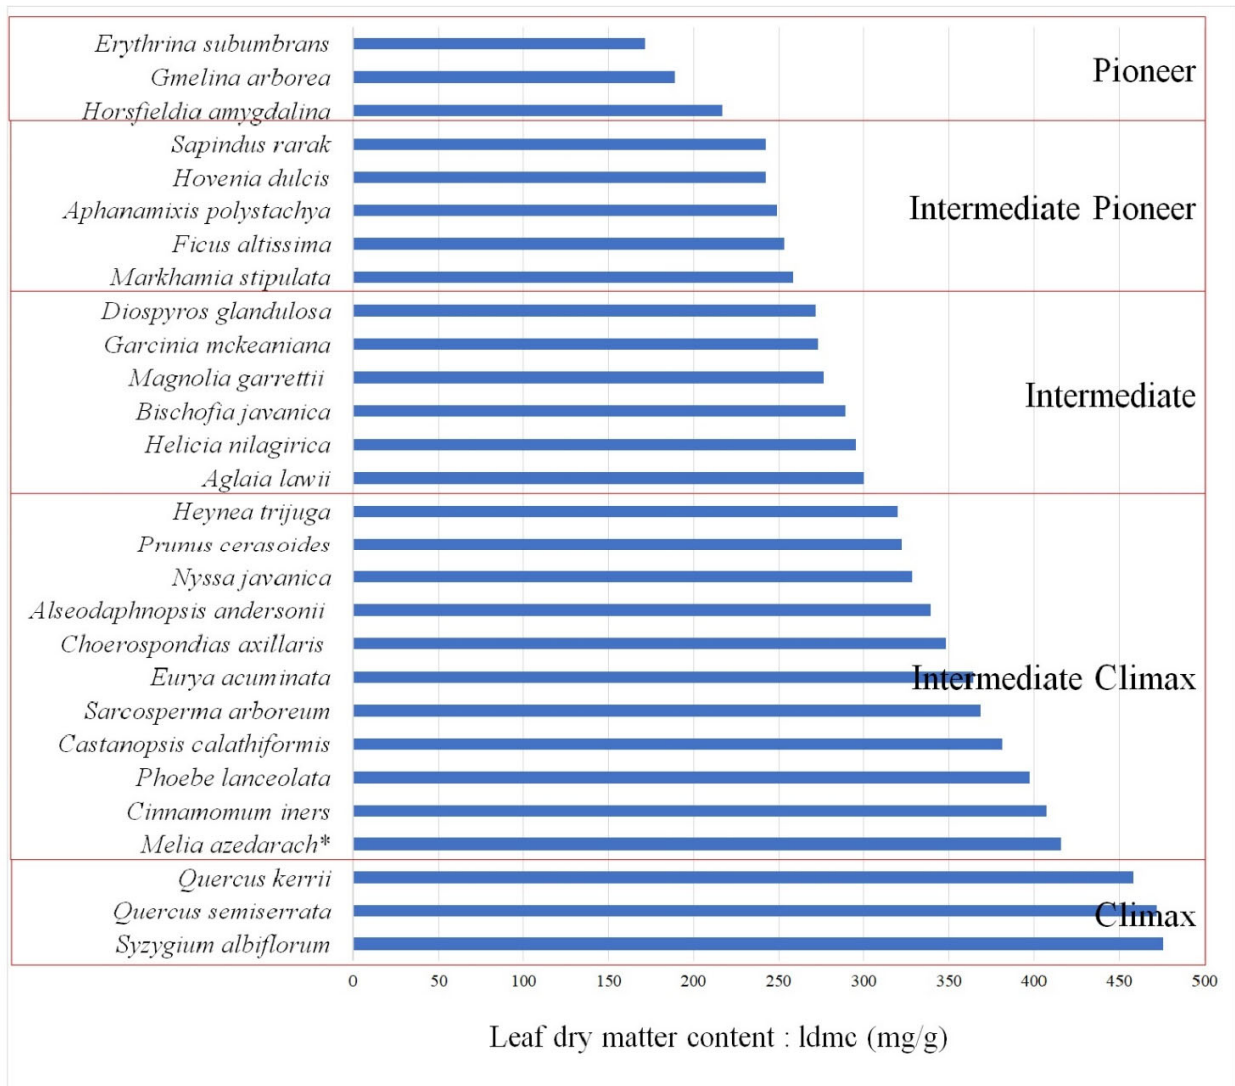

**Figure S9.** Leaf dry matter content (LDMC) as an indicator of successional status.

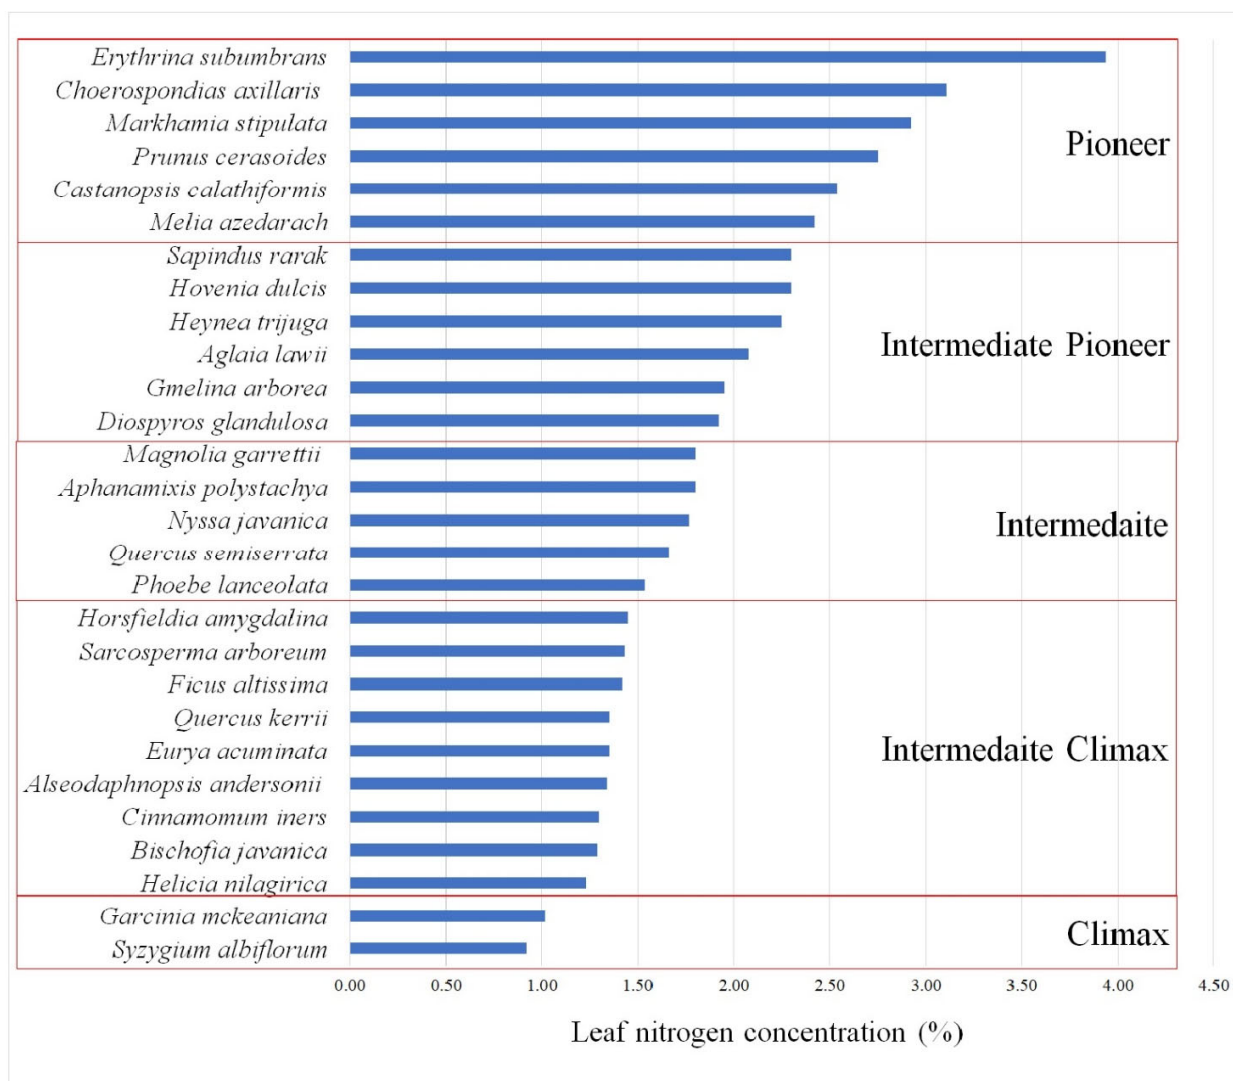

**Figure S10.** Leaf nitrogen concentration (LNC) as indicator of successional status

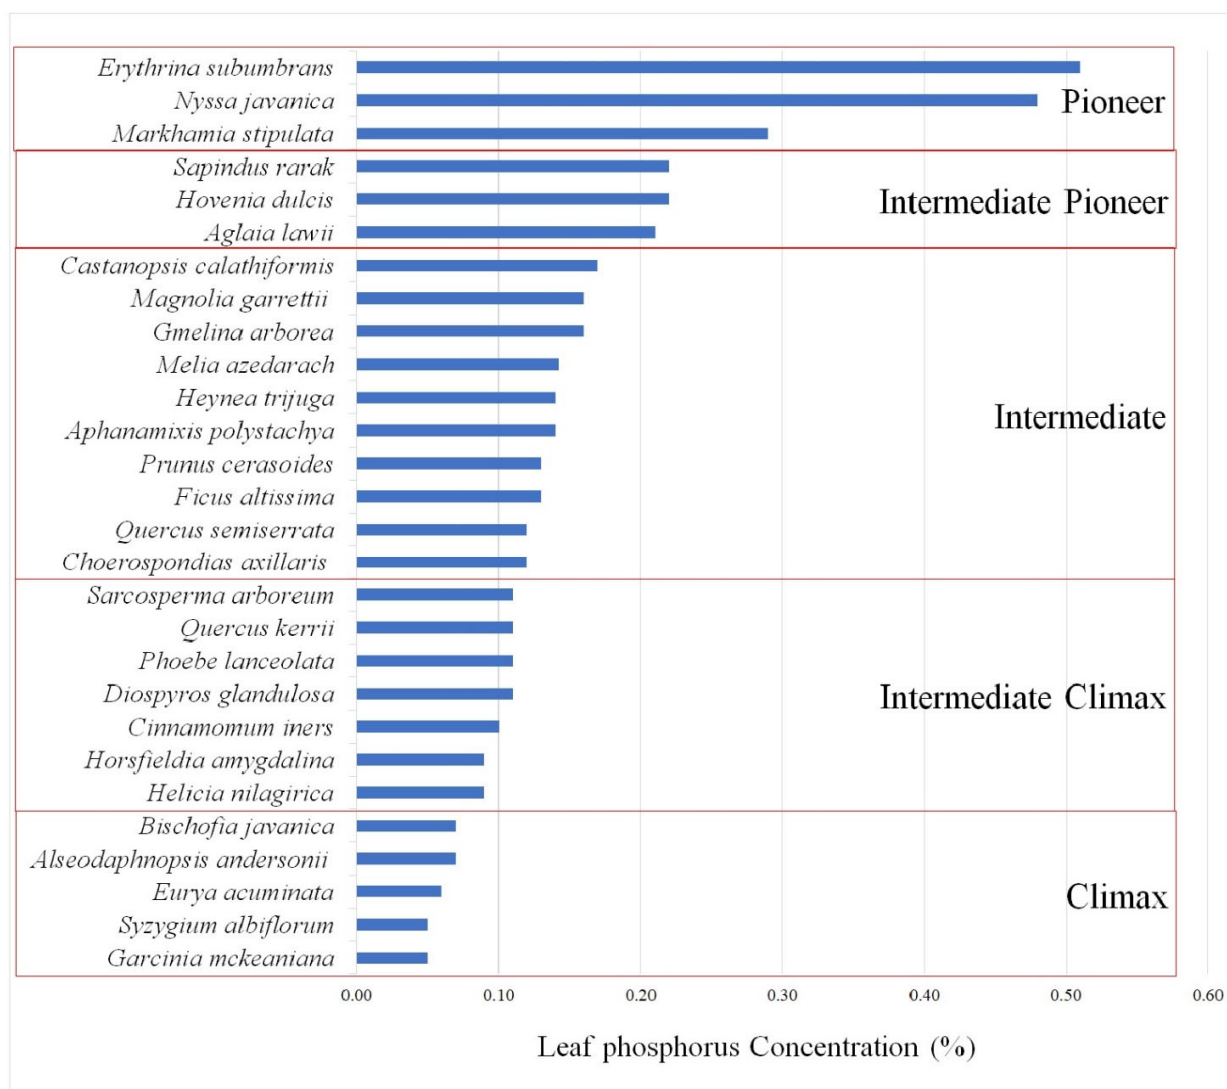

**Figure S11.** Leaf phosphorus concentration (LPC) as indicator of successional status.

**Table S1.** Seedling type as an indicator of successional status

| Epigeal seedling<br>(Pioneer feature) | Semi-hypogeal seedling<br>(Intermediate feature) | Hypogeal seedling<br>(Climax feature) |
|---------------------------------------|--------------------------------------------------|---------------------------------------|
| <i>Markhamia stipulata</i>            | <i>Erythrina subumbrans</i>                      | <i>Quercus kerrii</i>                 |
| <i>Bischofia javanica</i>             | <i>Alseodaphnopsis andersonii</i>                | <i>Castanopsis calathiformis</i>      |
| <i>Nyssa javanica</i>                 |                                                  | <i>Quercus semiserrata</i>            |
| <i>Gmelina arborea</i>                |                                                  | <i>Cinnamomum iners</i>               |
| <i>Hovenia dulcis</i>                 |                                                  | <i>Aglaia lawii</i>                   |
| <i>Prunus cerasoides</i>              |                                                  | <i>Horsfieldia amygdalina</i>         |
| <i>Sapindus rarak</i>                 |                                                  | <i>Aphanamixis polystachya</i>        |
| <i>Ficus altissima</i>                |                                                  | <i>Syzygium albiflorum</i>            |
| <i>Eurya acuminata</i>                |                                                  | <i>Garcinia mckeaniana</i>            |
| <i>Diospyros glandulosa</i>           |                                                  | <i>Sarcosperma arboreum</i>           |
| <i>Magnolia garrettii</i>             |                                                  | <i>Helicia nilagirica</i>             |
| <i>Spondias axillaris</i>             |                                                  | <i>Heynea trijuga</i>                 |
| <i>Melia azedarach</i>                |                                                  | <i>Phoebe lanceolata</i>              |

**Table S2.** Germination response to light and shade (GRLS) as an indicator of successional status

| High light condition<br>(Pioneer feature) | Both condition<br>(Intermediate feature) | Low light condition<br>(Climax feature) |
|-------------------------------------------|------------------------------------------|-----------------------------------------|
| <i>Diospyros glandulosa</i>               | <i>Alseodaphnopsis andersonii</i>        | <i>Aglaia lawii</i>                     |
| <i>Erythrina subumbrans</i>               | <i>Aphanamixis polystachya</i>           | <i>Bischofia javanica</i>               |
| <i>Eurya acuminata</i>                    | <i>Castanopsis calathiformis</i>         | <i>Helicia nilagirica</i>               |
| <i>Ficus altissima</i>                    | <i>Choerospondias axillaris</i>          | <i>Horsfieldia amygdalina</i>           |
| <i>Garcinia mckeaniana</i>                | <i>Cinnamomum iners</i>                  | <i>Sarcosperma arboreum</i>             |
| <i>Gmelina arborea</i>                    | <i>Hovenia dulcis</i>                    |                                         |
| <i>Heynea trijuga</i>                     | <i>Markhamia stipulata</i>               |                                         |
| <i>Magnolia garrettii</i>                 | <i>Nyssa javanica</i>                    |                                         |
| <i>Melia azedarach</i>                    | <i>Phoebe lanceolata</i>                 |                                         |
| <i>Prunus cerasoides</i>                  | <i>Quercus kerrii</i>                    |                                         |
| <i>Syzygium albiflorum</i>                | <i>Quercus semiserrata</i>               |                                         |
|                                           | <i>Sapindus rarak</i>                    |                                         |

**Table S3.** Data sources for the for the functional trait variables used in this study

| No. | Variable                   | Abbreviation | Units                | Primary/ Secondary | Source/method                                          |
|-----|----------------------------|--------------|----------------------|--------------------|--------------------------------------------------------|
| 1   | Relative growth rate ratio | RGR ratio    |                      | Primary/ Secondary | FORRU; this study                                      |
| 2   | Mortality ratio            | M ratio      |                      | Primary/ Secondary | FORRU; this study                                      |
| 3   | Half-life                  | HR           | Year                 | Primary/ Secondary | FORRU; this study                                      |
| 4   | Wood density               | WD           | (g/cm <sup>3</sup> ) | Secondary          | Titinan, 2019.; Kanlayarat, 2017.; Zanne et al., 2009. |
| 5   | Crown length NS            | CNS          | m                    | Primary/ Secondary | Shannon & Tiansawat, 2019; this study                  |
| 6   | Crown length EW            | CEW          | m                    | Primary/ Secondary | Shannon & Tiansawat, 2019; this study                  |
| 7   | Crown area                 | CA           | m <sup>2</sup>       | Primary/ Secondary | Shannon & Tiansawat, 2019; this study                  |
| 8   | Tree height                | TH           | m                    | Primary/ Secondary | Shannon & Tiansawat, 2019; this study                  |
| 9   | Crown width ratio          | CWR          | m <sup>2</sup> /m    | Primary/ Secondary | Shannon & Tiansawat, 2019; this study                  |
| 10  | First branch height        | FBH          | m                    | Primary/ Secondary | Shannon & Tiansawat, 2019; this study                  |
| 11  | Crown depth                | CD           | m                    | Primary/ Secondary | Shannon & Tiansawat, 2019; this study                  |
| 12  | Leaf area                  | LA           | cm <sup>2</sup>      | Primary/ Secondary | Shannon & Tiansawat, 2019; this study                  |
| 13  | Specific leaf area         | SLA          | mm <sup>2</sup> /mg  | Primary/ Secondary | Shannon & Tiansawat, 2019; this study                  |
| 14  | Leaf mass per area         | LMA          | mg/mm <sup>2</sup>   | Primary/ Secondary | Shannon & Tiansawat, 2019; this study                  |
| 15  | Leaf dry matter content    | LDMC         | mg/g                 | Primary/ Secondary | Shannon & Tiansawat, 2019; this study                  |
| 16  | Leaf thickness             | LTK          | nm                   | Secondary          | Shannon & Tiansawat, 2019                              |

**Table S3.** (continued).

| No. | Variable                                | Abbreviation | Units           | Primary/ Secondary | Source/method                                                                                                              |
|-----|-----------------------------------------|--------------|-----------------|--------------------|----------------------------------------------------------------------------------------------------------------------------|
| 17  | Leaf toughness                          | LTG          | N/mm            | Secondary          | Shannon & Tiansawat, 2019                                                                                                  |
| 18  | Leaf nitrogen concentration             | LNC          | %               | Primary/ Secondary | Shannon & Tiansawat, 2019; this study                                                                                      |
| 19  | Leaf phosphorus concentration           | LPC          | %               | Primary/ Secondary | Shannon & Tiansawat, 2019; this study                                                                                      |
| 20  | Seed length                             | SL           | mm              | Primary/ Secondary | CMU, 2020; FORRU database; Khlangsap et al., 2019; Naruangsri, 2017; Pakkard. G., 1997; Slik JWF, 2009 onwards; this study |
| 21  | Seed width                              | SW           | mm              | Primary/ Secondary | CMU, 2020; FORRU database; Khlangsap et al., 2019; Naruangsri, 2017; Pakkard. G., 1997; Slik JWF, 2009 onwards; this study |
| 22  | Seed thickness                          | ST           | mm              | Primary/ Secondary | CMU, 2020; FORRU database; Khlangsap et al., 2019; Naruangsri, 2017; Pakkard. G., 1997; Slik JWF, 2009 onwards; this study |
| 23  | Seed volume                             | SV           | mm <sup>3</sup> | Primary/ Secondary | CMU, 2020; FORRU database; Khlangsap et al., 2019; Naruangsri, 2017; Pakkard. G., 1997; Slik JWF, 2009 onwards; this study |
| 24  | Dry seed mass                           | DSM          | g               | Secondary          | CMU, 2020; FORRU database; Naruangsri, 2017, Pakkard. G., 1997; Waiboonya, 2017                                            |
| 25  | Median length of dormancy               | MLD          | day             | Secondary          | FORRU database; Waiboonya, 2017.                                                                                           |
| 26  | Seedling type                           | ST           |                 | Secondary          | Flora of China; FORRU database; Naruangsri, 2017, Plant Resources of South-East Asia; Slik JWF, 2009 onwards.              |
| 27  | Germination response to light and shade | GRLS         |                 | Secondary          | FORRU database                                                                                                             |

**Table S4.** Data for 27 functional traits (mean values) of 28 framework tree species. Non-correlated traits are indicated with an asterisk. RGR = relative growth rate; NS = North to South; EW = East to West; LNC = leaf nitrogen content; LPC = leaf phosphorus content; GRLS germination response to light and shade.

| No. | Species                           | RGR<br>height<br>ratio * | mortality<br>ratio * | half-<br>life * | wood<br>density<br>* | crown<br>length<br>NS | crown<br>length<br>EW | crown<br>area | tree<br>height | crown ratio<br>(area/height) | first<br>branch<br>height | crown<br>depth | leaf<br>area *  | specific<br>leaf area * | leaf mass<br>per area * |
|-----|-----------------------------------|--------------------------|----------------------|-----------------|----------------------|-----------------------|-----------------------|---------------|----------------|------------------------------|---------------------------|----------------|-----------------|-------------------------|-------------------------|
|     |                                   |                          |                      | Year            | g/cm <sup>3</sup>    | m                     | m                     | m             | m              | m <sup>2</sup> /m            | m                         | m              | cm <sup>2</sup> | mm <sup>2</sup> /mg     | mg/mm <sup>2</sup>      |
| 1   | <i>Aglaia lawii</i>               | 2.44                     | 0.80                 | 2.6             | 0.69                 | 2.20                  | 1.92                  | 4.57          | 2.53           | 0.80                         | 1.97                      | 1.04           | 83.20           | 18.06                   | 0.06                    |
| 2   | <i>Alseodaphnopsis andersonii</i> | 6.39                     | 0.46                 | 42.0            | 0.57                 | 2.85                  | 2.99                  | 7.62          | 6.38           | 1.00                         | 2.59                      | 3.83           | 233.19          | 11.97                   | 0.09                    |
| 3   | <i>Aphanamixis polystachya</i>    | 1.89                     | 1.34                 | 1.4             | 0.54                 | 1.79                  | 1.69                  | 2.55          | 3.31           | 1.15                         | 2.43                      | 1.44           | 182.91          | 15.61                   | 0.07                    |
| 4   | <i>Bischofia javanica</i>         | 5.76                     | 0.26                 | 32.5            | 0.57                 | 2.97                  | 2.92                  | 7.38          | 5.85           | 1.22                         | 2.24                      | 3.61           | 66.03           | 13.94                   | 0.08                    |
| 5   | <i>Castanopsis calathiformis</i>  | 7.62                     | 0.11                 | 74.5            | 0.67                 | 8.44                  | 9.96                  | 71.87         | 16.57          | 4.79                         | 3.71                      | 12.78          | 162.50          | 15.76                   | 0.07                    |
| 6   | <i>Choerospondias axillaris</i>   | 6.46                     | 0.11                 | 27.6            | 0.41                 | 6.22                  | 7.25                  | 38.11         | 16.20          | 2.32                         | 4.23                      | 11.97          | 30.52           | 27.83                   | 0.04                    |
| 7   | <i>Cinnamomum iners</i>           | 2.20                     | 0.49                 | 25.9            | 0.50                 | 5.11                  | 4.85                  | 20.05         | 8.20           | 2.50                         | 1.74                      | 6.47           | 83.96           | 12.40                   | 0.08                    |
| 8   | <i>Diospyros glandulosa</i>       | 2.24                     | 0.67                 | 3.8             | 0.51                 | 2.02                  | 2.06                  | 3.64          | 6.03           | 0.72                         | 3.34                      | 2.03           | 70.61           | 24.65                   | 0.04                    |
| 9   | <i>Erythrina subumbrans</i>       | 27.95                    | 0.19                 | 10.1            | 0.28                 | 3.60                  | 3.50                  | 12.57         | 9.65           | 1.05                         | 4.65                      | 5.00           | 78.89           | 38.45                   | 0.03                    |
| 10  | <i>Eurya acuminata</i>            | 2.02                     | 3.94                 | 27.0            | 0.56                 | 3.38                  | 3.38                  | 10.67         | 8.27           | 1.30                         | 5.17                      | 3.10           | 16.90           | 18.50                   | 0.06                    |
| 11  | <i>Ficus altissima</i>            | 9.76                     | 0.35                 | 24.1            | 0.47                 | 4.10                  | 4.02                  | 16.24         | 7.72           | 1.67                         | 2.00                      | 5.72           | 243.82          | 8.91                    | 0.12                    |
| 12  | <i>Garcinia mckeaniana</i>        | 2.95                     | 5.63                 | 0.9             | 0.74                 | 3.81                  | 3.68                  | 13.70         | 6.14           | 2.01                         | 2.50                      | 3.53           | 134.40          | 14.59                   | 0.07                    |
| 13  | <i>Gmelina arborea</i>            | 8.10                     | 0.24                 | 11.4            | 0.51                 | 1.42                  | 1.55                  | 2.30          | 6.71           | 0.31                         | 3.57                      | 3.77           | 180.27          | 40.09                   | 0.03                    |
| 14  | <i>Helicia nilagirica</i>         | 3.47                     | 0.80                 | 22.7            | 0.64                 | 2.37                  | 2.32                  | 5.21          | 6.08           | 0.92                         | 1.37                      | 4.71           | 92.07           | 18.03                   | 0.06                    |
| 15  | <i>Heynea trijuga</i>             | 3.06                     | 0.18                 | 21.1            | 0.51                 | 4.56                  | 4.84                  | 18.39         | 8.69           | 2.27                         | 3.73                      | 4.94           | 69.02           | 20.49                   | 0.05                    |
| 16  | <i>Horsfieldia amygdalina</i>     | 0.44                     | 1.08                 | 14.4            | 0.46                 | 3.18                  | 3.39                  | 10.59         | 6.04           | 1.75                         | 2.02                      | 3.84           | 98.59           | 17.23                   | 0.06                    |
| 17  | <i>Hovenia dulcis</i>             | 8.51                     | 0.30                 | 8.6             | 0.51                 | 2.00                  | 2.04                  | 4.15          | 7.84           | 0.63                         | 3.41                      | 3.68           | 74.44           | 45.31                   | 0.02                    |
| 18  | <i>Magnolia garrettii</i>         | 3.67                     | 1.39                 | 21.6            | 0.51                 | 5.82                  | 6.50                  | 32.78         | 12.12          | 2.62                         | 2.64                      | 9.49           | 151.93          | 16.92                   | 0.06                    |
| 19  | <i>Markhamia stipulata</i>        | 5.70                     | 1.27                 | 7.4             | 0.68                 | 2.95                  | 3.26                  | 11.01         | 5.17           | 7.85                         | 1.79                      | 3.39           | 152.90          | 31.32                   | 0.03                    |
| 20  | <i>Melia azedarach</i>            | 29.23                    | 0.15                 | 9.4             | 0.46                 | 13.58                 | 13.65                 | 190.17        | 16.44          | 11.40                        | 7.65                      | 8.80           | 1001.29         | 7.92                    | 0.13                    |
| 21  | <i>Nyssa javanica</i>             | 4.31                     | 0.47                 | 21.6            | 0.51                 | 7.18                  | 6.80                  | 40.09         | 12.58          | 3.28                         | 4.95                      | 7.63           | 90.40           | 19.30                   | 0.05                    |
| 22  | <i>Phoebe lanceolata</i>          | 3.39                     | 2.31                 | 49.0            | 0.69                 | 3.69                  | 3.83                  | 11.54         | 5.60           | 2.25                         | 0.89                      | 4.68           | 84.47           | 16.24                   | 0.06                    |
| 23  | <i>Prunus cerasoides</i>          | 8.71                     | 0.55                 | 22.8            | 0.50                 | 5.36                  | 5.27                  | 22.59         | 11.86          | 1.90                         | 4.01                      | 10.12          | 37.85           | 39.29                   | 0.03                    |
| 24  | <i>Quercus kerrii</i>             | 2.51                     | 1.27                 | 17.0            | 0.68                 | 2.46                  | 2.30                  | 5.68          | 6.05           | 0.74                         | 2.76                      | 3.68           | 81.68           | 11.12                   | 0.09                    |
| 25  | <i>Quercus semiserrata</i>        | 2.42                     | 1.24                 | 18.8            | 0.73                 | 5.06                  | 4.90                  | 22.14         | 9.22           | 2.43                         | 1.31                      | 7.93           | 48.30           | 16.05                   | 0.06                    |
| 26  | <i>Sapindus rarak</i>             | 11.09                    | 0.54                 | 19.9            | 0.57                 | 2.72                  | 2.93                  | 7.60          | 5.55           | 0.85                         | 3.41                      | 3.68           | 74.44           | 29.74                   | 0.02                    |
| 27  | <i>Sarcosperma arboreum</i>       | 3.51                     | 1.32                 | 26.1            | 0.45                 | 4.98                  | 4.68                  | 18.87         | 9.32           | 1.91                         | 4.21                      | 5.20           | 79.70           | 13.49                   | 0.07                    |
| 28  | <i>Syzygium albiflorum</i>        | 2.65                     | 0.51                 | 34.4            | 0.73                 | 3.84                  | 3.38                  | 10.88         | 8.53           | 1.33                         | 3.21                      | 5.31           | 56.59           | 11.17                   | 0.09                    |



Table S4. (continued).

| No. | Species                           | leaf dry<br>matter<br>content * | leaf<br>thickness | leaf<br>toughness | LNC * | LPC *  | seed<br>length | seed<br>width | seed<br>thickness | seed<br>volume  | dry<br>seed<br>mass * | median<br>length of<br>dormancy * | seedling type<br>* | GRIS * |
|-----|-----------------------------------|---------------------------------|-------------------|-------------------|-------|--------|----------------|---------------|-------------------|-----------------|-----------------------|-----------------------------------|--------------------|--------|
|     |                                   | mg/g                            | mm                | N/mm              | %     | %      | mm             | mm            | mm                | mm <sup>3</sup> | g                     | day                               |                    |        |
| 1   | <i>Aglaia lawii</i>               | 300.05                          | 0.12              | 3.80              | 2.08  | 0.21   | 14.00          | 7.00          | 6.00              | 588.00          | 0.30                  | 25                                | hypogeal           | shade  |
| 2   | <i>Alseodaphnopsis andersonii</i> | 339.19                          | 0.16              | 4.49              | 1.34  | 0.07   | 37.03          | 21.11         | 20.04             | 15665.33        | 6.09                  | 44                                | semi-epigeal       | both   |
| 3   | <i>Aphanamixis polystachya</i>    | 249.20                          | 0.16              | 4.90              | 1.8   | 0.14   | 14.58          | 10.80         | 9.41              | 1481.74         | 0.74                  | 45                                | hypogeal           | both   |
| 4   | <i>Bischofia javanica</i>         | 289.06                          | 0.17              | 3.58              | 1.29  | 0.07   | 5.08           | 3.97          | 3.24              | 65.10           | 0.02                  | 26                                | epigeal            | shade  |
| 5   | <i>Castanopsis calathiformis</i>  | 381.00                          | 0.10              | 4.08              | 2.54  | 0.17   | 29.21          | 23.00         | 22.39             | 15042.27        | 7.19                  | 16                                | hypogeal           | both   |
| 6   | <i>Choerospondias axillaris</i>   | 348.22                          | 0.08              | 1.17              | 3.11  | 0.12   | 17.00          | 14.32         | 13.71             | 3337.56         | 1.70                  | 133.65                            | epigeal            | both   |
| 7   | <i>Cinnamomum iners</i>           | 406.77                          | 0.14              | 9.13              | 1.3   | 0.1    | 9.51           | 6.63          | 6.44              | 406.05          | 0.13                  | 24                                | hypogeal           | both   |
| 8   | <i>Diospyros glandulosa</i>       | 271.59                          | 0.11              | 1.61              | 1.92  | 0.11   | 14.20          | 8.93          | 2.80              | 355.06          | 0.20                  | 88.15                             | epigeal            | sun    |
| 9   | <i>Erythrina subumbrans</i>       | 171.76                          | 0.13              | 1.38              | 3.94  | 0.51   | 13.90          | 8.63          | 7.82              | 938.06          | 0.35                  | 7                                 | semi-epigeal       | sun    |
| 10  | <i>Eurya acuminata</i>            | 364.09                          | 0.11              | 2.82              | 1.35  | 0.06   | 0.50           | 0.50          | 0.50              | 0.13            | 0.00                  | 60                                | epigeal            | sun    |
| 11  | <i>Ficus altissima</i>            | 253.23                          | 0.29              | 7.87              | 1.42  | 0.13   | 1.54           | 0.99          | 0.97              | 1.49            | 0.00                  | 58                                | epigeal            | sun    |
| 12  | <i>Garcinia mckeaniana</i>        | 273.07                          | 0.19              | 5.82              | 1.02  | 0.05   | 26.29          | 12.07         | 7.48              | 2373.56         | 0.67                  | 66                                | hypogeal           | sun    |
| 13  | <i>Gmelina arborea</i>            | 188.88                          | 0.12              | 0.97              | 1.95  | 0.16   | 17.25          | 8.00          | 7.07              | 975.66          | 0.39                  | 39.15                             | epigeal            | sun    |
| 14  | <i>Helicia nilagirica</i>         | 295.50                          | 0.14              | 3.73              | 1.23  | 0.09   | 20.37          | 19.95         | 18.96             | 7704.99         | 1.80                  | 89                                | hypogeal           | shade  |
| 15  | <i>Heynea trijuga</i>             | 319.48                          | 0.11              | 3.15              | 2.25  | 0.14   | 10.44          | 9.59          | 8.85              | 886.06          | 0.11                  | 96                                | hypogeal           | sun    |
| 16  | <i>Horsfieldia amygdalina</i>     | 216.88                          | 0.15              | 5.66              | 1.45  | 0.09   | 33.40          | 18.26         | 17.88             | 10904.73        | 3.37                  | 35                                | hypogeal           | shade  |
| 17  | <i>Hovenia dulcis</i>             | 242.31                          | 0.05              | 0.77              | 2.3   | 0.22   | 5.57           | 5.37          | 2.36              | 70.59           | 0.03                  | 97                                | epigeal            | both   |
| 18  | <i>Magnolia garrettii</i>         | 276.41                          | 0.16              | 4.27              | 1.8   | 0.16   | 9.88           | 5.47          | 3.37              | 182.13          | 0.05                  | 93.85                             | epigeal            | sun    |
| 19  | <i>Markhamia stipulata</i>        | 258.75                          | 0.07              | 1.88              | 2.92  | 0.29   | 19.84          | 11.93         | 1.98              | 468.65          | 0.10                  | 13                                | epigeal            | both   |
| 20  | <i>Melia azedarach</i>            | 415.76                          | NA                | NA                | 2.42  | 0.1425 | 10.84          | 3.67          | 2.84              | 112.89          | 0.05                  | 46                                | epigeal            | sun    |
| 21  | <i>Nyssa javanica</i>             | 328.18                          | 0.11              | 2.39              | 1.77  | 0.48   | 15.11          | 7.99          | 2.88              | 347.37          | 0.19                  | 28                                | epigeal            | both   |
| 22  | <i>Phoebe lanceolata</i>          | 397.66                          | 0.11              | 4.08              | 1.54  | 0.11   | 37.03          | 21.11         | 20.04             | 15665.33        | 6.09                  | 206                               | hypogeal           | both   |
| 23  | <i>Prunus cerasoides</i>          | 322.04                          | 0.07              | 1.15              | 2.75  | 0.13   | 9.70           | 7.47          | 6.16              | 446.35          | 0.20                  | 47.65                             | epigeal            | sun    |
| 24  | <i>Quercus kerrii</i>             | 458.25                          | 0.14              | 6.35              | 1.35  | 0.11   | 15.06          | 14.68         | 12.60             | 2785.62         | 0.61                  | 14                                | hypogeal           | both   |
| 25  | <i>Quercus semiserrata</i>        | 471.93                          | 0.09              | 4.80              | 1.66  | 0.12   | 18.14          | 16.80         | 13.46             | 4101.96         | 1.50                  | 18                                | hypogeal           | both   |
| 26  | <i>Sapindus rarak</i>             | 242.31                          | 0.05              | 0.77              | 2.3   | 0.22   | 16.41          | 15.91         | 15.12             | 3947.58         | 1.72                  | 52                                | epigeal            | both   |
| 27  | <i>Sarcosperma arboreum</i>       | 368.14                          | 0.13              | 4.71              | 1.43  | 0.11   | 18.85          | 11.77         | 11.02             | 2444.95         | 1.00                  | 85                                | hypogeal           | shade  |
| 28  | <i>Syzygium albiflorum</i>        | 475.69                          | 0.16              | 4.25              | 0.92  | 0.05   | 19.34          | 17.71         | 16.92             | 5796.27         | 1.74                  | 24                                | hypogeal           | sun    |



**Table S5.** Previous reports of the successional status of the framework tree species examined in this study

Abbreviation: P = Pioneer, C = Climax, LS = Late Successional, I = Intermediate.

| Species                           | Shannon &<br>Tiansawat<br>(2019) | Jantawong<br>(2017) | Pothong<br>(2019) | Waiboonya<br>(2017) | Sinhaseni<br>(2008) | Betts<br>(2013) | Pakkard<br>(pers. comm.,<br>2021) | Gardner<br>(2007) | Maxwell &<br>Elliott<br>(2001) | Flora of<br>China | PROEA<br>(1998) |
|-----------------------------------|----------------------------------|---------------------|-------------------|---------------------|---------------------|-----------------|-----------------------------------|-------------------|--------------------------------|-------------------|-----------------|
| <i>Aglaia lawii</i>               | LS                               | -                   | -                 | -                   | -                   | -               | C                                 | C                 | C                              | -                 | -               |
| <i>Alseodaphnopsis andersonii</i> | P                                | -                   | -                 | -                   | C                   | -               | C                                 | -                 | C                              | -                 | C               |
| <i>Aphanamixis polystachya</i>    | P                                | -                   | -                 | -                   | -                   | -               | P                                 | C                 | C                              | -                 | C               |
| <i>Bischofia javanica</i>         | P                                | P                   | -                 | -                   | -                   | -               | I                                 | -                 | P                              | P                 | -               |
| <i>Castanopsis calathiformis</i>  | P                                | -                   | -                 | -                   | C                   | -               | C                                 | I                 | -                              | -                 | -               |
| <i>Choerospondias axillaris</i>   | P                                | P                   | -                 | P                   | P                   | P               | P                                 | -                 | -                              | -                 | P               |
| <i>Cinnamomum iners</i>           | P                                | -                   | -                 | -                   | -                   | -               | C                                 | C                 | -                              | P                 | -               |
| <i>Diospyros glandulosa</i>       | P                                | -                   | -                 | C                   | C                   | -               | C                                 | -                 | -                              | -                 | -               |
| <i>Erythrina subumbrans</i>       | P                                | P                   | -                 | -                   | P                   | P               | P                                 | P                 | -                              | -                 | P               |
| <i>Eurya acuminata</i>            | P                                | -                   | -                 | -                   | P                   | -               | C                                 | P                 | -                              | -                 | -               |
| <i>Ficus altissima</i>            | P                                | -                   | -                 | -                   | -                   | P               | C                                 | -                 | P                              | -                 | P               |
| <i>Garcinia mckeaniana</i>        | P                                | -                   | -                 | -                   | -                   | -               | C                                 | C                 | C                              | -                 | C               |
| <i>Gmelina arborea</i>            | P                                | P                   | -                 | P                   | -                   | P               | P                                 | P                 | P                              | P                 |                 |
| <i>Helicia nilagirica</i>         | LS                               | -                   | P                 | -                   | -                   | -               | C                                 | C                 | P                              | -                 | C               |

**Table S5.** (continued)

| Species                       | Shannon &<br>Tiansawat<br>(2019) | Jantawong<br>(2017) | Pothong<br>(2019) | Waiboonya<br>(2017) | Sinhaseni<br>(2008) | Betts<br>(2013) | Pakkard<br>(pers. comm.,<br>2021) | Gardner<br>(2007) | Maxwell<br>& Elliott<br>(2001) | Flora of<br>China | PROEA<br>(1998) |
|-------------------------------|----------------------------------|---------------------|-------------------|---------------------|---------------------|-----------------|-----------------------------------|-------------------|--------------------------------|-------------------|-----------------|
| <i>Heynea trijuga</i>         | P                                | C                   | -                 | -                   | P                   | -               | P                                 | P                 | P                              | -                 | -               |
| <i>Horsfieldia amygdalina</i> | LS                               | -                   | -                 | C                   | -                   | -               | C                                 | -                 | -                              | C                 | C               |
| <i>Hovenia dulcis</i>         | P                                | C                   | -                 | C                   | -                   | P               | P                                 | -                 | C                              | P                 |                 |
| <i>Magnolia garrettii</i>     | LS                               | -                   | -                 | -                   | -                   | P               | C                                 | -                 | C                              | -                 | P               |
| <i>Markhamia stipulata</i>    | P                                | -                   | -                 | -                   | P                   | -               | P                                 | P                 | P                              | -                 | -               |
| <i>Melia azedarach</i>        | P                                | P                   | -                 | -                   | -                   | P               | P                                 | P                 | -                              | P                 | -               |
| <i>Nyssa javanica</i>         | P                                | P                   | -                 | -                   | -                   | P               | C                                 | C                 | -                              | -                 | P               |
| <i>Phoebe lanceolata</i>      | P                                | -                   | C                 | -                   | C                   | -               | C                                 | C                 | P                              | -                 | C               |
| <i>Prunus cerasoides</i>      | P                                | P                   | -                 | P                   | P                   | -               | P                                 | P                 | P                              | -                 | -               |
| <i>Quercus kerrii</i>         | -                                | -                   | -                 | -                   | -                   | -               | C                                 | -                 | -                              | -                 | -               |
| <i>Quercus semiserrata</i>    | -                                | -                   | C                 | -                   | -                   | -               | C                                 | -                 | -                              | -                 | -               |
| <i>Sapindus rarak</i>         | LS                               | C                   | C                 | -                   | C                   | -               | I                                 | -                 | P                              | -                 | -               |
| <i>Sarcosperma arboreum</i>   | LS                               | C                   | C                 | -                   | C                   | -               | C                                 | C                 | -                              | -                 | -               |
| <i>Syzygium albiflorum</i>    | -                                | -                   | -                 | C                   | C                   | -               | C                                 | C                 | -                              | -                 | -               |
